# Supplementary material
Source: Elsevier journal article supplement (https://www.sciencedirect.com/science/article/pii/S169540332030237X)
Supplement: mmc1 [file S169540332030237X:mmc1.pdf]

## 1. DATOS GENERALES DEL NIÑO/A

1. **Edad:** .....años y .....meses.
2. **Sexo:** ☐ Niño ☐ Niña
3. **Curso actual:** ☐ 6º Infantil ☐ 1º Primaria ☐ 2º Primaria ☐ 3º Primaria
4. **Colegio**.....

## 2. DATOS FAMILIARES

1. **Vive con:** ☐ Padre (edad.....) ☐ Madre (edad.....) ☐ Familiares ☐ Cuidadores
2. **En qué medio viven:** ☐ Rural ☐ Pueblo ☐ Ciudad
3. **¿Cuántos hermanos tiene su hijo?** ☐ 0 ☐ 1 ☐ 2 ☐ 3 ☐ 4 ó más

## 3. COSTUMBRES AL ORINAR

1. **A qué edad le retiró el pañal por el día a su hijo**.....años y .....meses.
2. **¿Cuál fue el motivo de empezar a retirarle el pañal?**
  - ☐ El niño ya pedía pis
  - ☐ Estaba más de dos horas seco
  - ☐ Para empezar el colegio
  - ☐ Otro motivo.....
3. **¿Su hijo estaba completamente seco por el día cuando empezó el colegio?**
  - ☐ Sí ☐
  - ☐ No
4. **¿Como orinaba su hijo/a al retirarle el pañal?**
  - ☐ De pie
  - ☐ Sentado/a en orinal
  - ☐ Sentado/a en el váter con las piernas colgando
  - ☐ Sentado/a en el váter con las piernas apoyadas en alzador o altillo.
5. **¿Le cuelgan a su hijo/a habitualmente las piernas del váter al hacer pis?**
  - ☐ Siempre ☐ Casi siempre ☐ A veces ☐ Casi nunca ☐ Nunca
6. **¿Va su hijo a hacer pis en el colegio?** ☐ Sí ☐ No ☐ Casi nunca ☐ No sabe
7. **¿Si no va a hacer pis en el colegio por qué motivo es?**
  - ☐ Pudor, vergüenza ☐
  - ☐ Baños sucios
  - ☐ Otros.....
1. **¿Le facilitan a su hijo ir a hacer pis en el colegio?** ☐ Sí ☐ No ☐ No sabe

## 4. HÁBITO INTESTINAL

1. **¿Con qué frecuencia hace su hijo caca?**
  - ☐ 1 o más al día ☐ cada 2 días ☐ 1-2/ semana ☐ menos de 1/semana
2. **La forma de la caca es** ☐
  - Muy blanda ☐ Blanda con forma ☐ Duras ☐ Muy dura y seca
3. **¿Se le escapa la caca a su hijo?** ☐
  - No ☐ Sí, hace deposiciones en la ropa ☐ Sí, suele manchar
4. **¿Toma o tomó su hijo tratamiento para el estreñimiento?**
  - ☐ No ☐
  - ☐ Sí, ¿cuál? .....
5. **¿Cuántos vasos de agua bebe su hijo al día?**
  - ☐ menos de 4 ☐ 4-8 ☐ más de 8
6. **¿Cuántas piezas/porciones de fruta o verdura toma su hijo al día?**
  - ☐ Ninguna ☐ Menos de 2 ☐ 2-4 ☐ Más de 4

## 5. SÍNTOMAS URINARIOS

1. **¿El niño/a tiene pérdidas de orina durante el día?**
  - ☐ No ☐ A veces ☐ 1-2 veces al día ☐ Siempre

- ¿Desde que edad? .....
2. **¿Cuánto se moja por el día?**
    - ☐ La ropa interior húmeda ☐
    - ☐ Pantalones húmedos ☐
    - ☐ Pantalones empapados
  3. **¿En qué momento se le escapa?**
    - ☐ Al poco de orinar
    - ☐ No llega a tiempo al wáter
    - ☐ Después de 1 hora de haber hecho pis
    - ☐ Después de dos horas de haber hecho pis
    - ☐ Sólo con esfuerzos
    - ☐ Sólo con la risa
    - ☐ No sabe
  4. **¿El niño/a moja la cama por la noche?**

|                             |                                           |                                           |                                           |
|-----------------------------|-------------------------------------------|-------------------------------------------|-------------------------------------------|
| <input type="checkbox"/> No | <input type="checkbox"/> 1-2 veces/semana | <input type="checkbox"/> 3-5 veces/semana | <input type="checkbox"/> 6-7 veces/semana |
|-----------------------------|-------------------------------------------|-------------------------------------------|-------------------------------------------|
  5. **¿Cuánto se moja por la noche?** ☐
    - ☐ Sábanas húmedas
    - ☐ Sábanas empapadas
  6. **¿Cuántas veces hace pis a lo largo del día?**
    - ☐ Menos de 7 veces al día
    - ☐ 7 veces o más al día
  7. **¿Necesita su hijo hacer fuerza para orinar?**

|                             |                             |
|-----------------------------|-----------------------------|
| <input type="checkbox"/> No | <input type="checkbox"/> Sí |
|-----------------------------|-----------------------------|
  8. **¿Se queja de dolor cuando orina?**

|                             |                             |
|-----------------------------|-----------------------------|
| <input type="checkbox"/> No | <input type="checkbox"/> Sí |
|-----------------------------|-----------------------------|
  9. **¿Interrumpe el chorro de forma intermitente mientras hace pis?**

|                             |                             |
|-----------------------------|-----------------------------|
| <input type="checkbox"/> No | <input type="checkbox"/> Sí |
|-----------------------------|-----------------------------|
  10. **¿Tiene que volver al baño a orinar al poco de haberlo hecho?**

|                             |                             |
|-----------------------------|-----------------------------|
| <input type="checkbox"/> No | <input type="checkbox"/> Sí |
|-----------------------------|-----------------------------|
  11. **¿Tiene que ir a orinar corriendo?**

|                             |                             |
|-----------------------------|-----------------------------|
| <input type="checkbox"/> No | <input type="checkbox"/> Sí |
|-----------------------------|-----------------------------|
  12. **¿Aguanta las ganas de ir al baño cruzando las piernas?**

|                             |                             |
|-----------------------------|-----------------------------|
| <input type="checkbox"/> No | <input type="checkbox"/> Sí |
|-----------------------------|-----------------------------|
  13. **¿Pospone su hijo ir al baño a hacer pis?** ☐

|                             |                             |
|-----------------------------|-----------------------------|
| <input type="checkbox"/> No | <input type="checkbox"/> Sí |
|-----------------------------|-----------------------------|
  14. **¿Se le escapa la orina cuando va de camino al baño?**

|                             |                             |
|-----------------------------|-----------------------------|
| <input type="checkbox"/> No | <input type="checkbox"/> Sí |
|-----------------------------|-----------------------------|
  15. **¿Algunos días no hace caca?** ☐

|                             |                             |
|-----------------------------|-----------------------------|
| <input type="checkbox"/> No | <input type="checkbox"/> Sí |
|-----------------------------|-----------------------------|
  16. **Si el niño padece los síntomas descritos, ¿afecta esto a su vida familiar, social o escolar?** ☐

|                             |                                  |                                        |                                            |
|-----------------------------|----------------------------------|----------------------------------------|--------------------------------------------|
| <input type="checkbox"/> No | <input type="checkbox"/> A veces | <input type="checkbox"/> Sí, le afecta | <input type="checkbox"/> Está muy afectado |
|-----------------------------|----------------------------------|----------------------------------------|--------------------------------------------|

Muchas gracias por su colaboración
